# Supplementary material for: The Relation Between Using Inappropriate Medications and Quality of Life Among the Elderly Living in Kerman&nbsp;
Source: Research Square preprint supplement (doi:10.21203/rs.3.rs-122198/v1), 2020-12-28
Supplement: Supplementary file 1 [file d84a97755a641f844a82a4e5.docx]

**Affiliations**

**Research Center for Health Services Administration, Institute of Future Studies in Health, Kerman University of Medical Sciences, Kerman, Iran.**

Vida Kardanmoghadam, Leila Vali & Mohammadreza Amiresmaili

**Neurology Research Center, Kerman University of Medical Sciences, Kerman, Iran.**

Narges Khanjani

**Health Technology Assessment Group, Deputy of Treatment, Ministry of Health and Medical Education, Tehran, Iran**

Kourosh Rajabkhah

**Contributions**

All authors made substantial contributions to the conception or design of the work. VK, LV and MR-A acquired the data. VK and N-KH analysed the data. VK, LV, MR-A and N-KH had access to and interpreted the data. VK and KR drafted the manuscript and all authors critically revised it for intellectual content. All authors have read and approved the final manuscript and agree to be accountable for all aspects of the work.

**Corresponding author**

Correspondence to Mohammadreza Amiresmaili.
